## Short chain fatty acids enhance expression and activity of the umami taste receptor in enteroendocrine cells via a $G\alpha_{i/o}$ pathway

1 **Matilda Shackley<sup>1,2</sup>, Edward W. Tate<sup>3</sup>, Alastair J.H. Brown<sup>4</sup>, Gary Frost<sup>1\*</sup>, Aylin C.**  
2 **Hanyaloglu<sup>2\*</sup>**

3 <sup>1</sup>Section of Nutrition Research, Department Metabolism, Digestion and Reproduction, Imperial  
4 College London, London, UK

5 <sup>2</sup>Institute of Reproductive and Developmental Biology, Department Metabolism, Digestion and  
6 Reproduction, Imperial College London, London, UK

7 <sup>3</sup>Department of Chemistry, Imperial College London, London, UK

8 <sup>4</sup>Translational Sciences, Sosei Heptares, Cambridge, UK

9 **\* Correspondence:**

10 Aylin Hanyaloglu & Gary Frost

11 [a.hanyaloglu@imperial.ac.uk](mailto:a.hanyaloglu@imperial.ac.uk); [g.frost@imperial.ac.uk](mailto:g.frost@imperial.ac.uk)

12 **Keywords: short chain fatty acid<sub>1</sub>, GPCR<sub>2</sub>, taste receptor<sub>3</sub>, enteroendocrine cell<sub>4</sub>,**  
13 **heterotrimeric G proteins<sub>5</sub>.**

14 **Abstract**

15 The short chain fatty acids (SCFAs) acetate, butyrate and propionate, are produced by the fermentation  
16 of non-digestible carbohydrates by the gut microbiota. SCFAs are of interest because they regulate  
17 appetite, adiposity, metabolism, glycemic control and immunity. SCFAs act at two distinct  
18 G protein-coupled receptors (GPCRs), FFAR2 and FFAR3. These are expressed in intestinal  
19 enteroendocrine cells (EECs), where they mediate SCFA-driven anorectic gut hormone release. EECs  
20 also express other GPCRs that act as nutrient sensors, in a manner that is plastic and adaptable to the  
21 environment. SCFAs may elicit some of their health-promoting effects by altering levels of GPCRs in  
22 EECs, thus, enhancing gut sensitivity to dietary molecules. Here, we identified that exposure of the  
23 murine EEC STC-1 cell-line to a concentration of SCFAs found in the colon, specifically enhances  
24 mRNA levels of the umami taste receptors TASR1 and TASR3, without altering levels of the SCFA  
25 GPCRs, FFAR2 and FFAR3. Interestingly, treatment of EECs with propionate or butyrate, but not  
26 acetate, increased levels of umami receptor transcripts. This phenomenon was reversed by inhibiting  
27  $G\alpha_{i/o}$  signaling with pertussis toxin, suggesting that SCFAs act through FFAR2/3 to alter gene  
28 expression. Surprisingly, neither a FFAR3- nor a FFAR2-selective synthetic ligand could increase  
29 TASR1/TASR3 mRNA levels. We assessed the functional impact of increases in TASR1/TASR3  
30 expression using unique pharmacological properties of the umami taste receptor; namely, the  
31 potentiation of signaling by inosine monophosphate. We found that the umami taste receptor induced  
32 inosine-1-phosphate and calcium signaling in response to L-alanine and L-monosodium glutamate, and  
33 that butyrate pretreatment significantly enhanced such signaling. Our study reveals that SCFAs may  
34 contribute to EEC adaptation and alter EEC sensitivity to bioactive nutrients.

## 35 Introduction

36 After ingestion, physical and chemical processes digest food into a large and dynamic array of  
37 metabolites within the gastrointestinal (GI) tract. The detection of these, via ‘nutrient sensing’  
38 mechanisms, results in the secretion of over 20 different peptides from enteroendocrine cells (EECs)  
39 (1). Of particular note are colonic short-chain fatty acids (SCFAs), the anaerobic fermentation of non-  
40 digestible carbohydrates, components of high-fiber diets. These are carboxylic acids with fewer than  
41 six carbons (Cs), which can reach high luminal concentrations of  $10^{-1}$  M (2):(3). 95% of the SCFAs  
42 produced in the GI tract are acetate (2Cs), propionate (3Cs) and butyrate (4Cs) (3,4). These SCFAs, in  
43 particular propionate, are currently of interest, not only due to their ability to regulate anorectic gut  
44 hormone release, but also to promote weight loss, reduce abdominal adiposity and improve insulin  
45 sensitivity (5–8).

46 A large range of lumenally expressed cell surface proteins is responsible for nutrient sensing. A  
47 significant proportion of these are members of the superfamily of G protein-coupled receptors  
48 (GPCRs) (8). SCFAs activate two distinct GPCRs that are known to be expressed in EECs, FFAR2  
49 and FFAR3 (8–13). When expressed in heterologous cells, these two receptors display differential  
50 potency for each SCFA, which also differs between human and mouse receptor orthologs, yet  
51 propionate is the most potent of the SCFAs at both murine receptors (13–15). FFAR2 and FFAR3 both  
52 activate  $G\alpha_{i/o}$  signaling, and FFAR2 can also signal via  $G\alpha_{q/11}$  to release calcium ( $Ca^{2+}$ ) from  
53 intracellular stores; a pathway associated with its role in inducing gut hormone secretion from human  
54 and mouse EECs (5,7,8,16–18). However, beyond regulating levels of gut hormone expression (19)  
55 and secretion (5,7,17,18), our understanding of the additional roles of FFAR2/3 in EECs is limited.

56 A variety of GPCRs act as nutrient sensors in EECs, each responding to a distinct range of  
57 macromolecules and metabolites.(8) As the GPCR expression in EECs is not static (20), one possibility  
58 is that nutrients can alter GPCR expression levels, adapting the sensitivity of the gut to other dietary  
59 molecules. There is evidence to support this; obese individuals have significantly different expression  
60 profiles of nutrient sensing GPCRs in their GI tract compared with lean controls, with significant gene  
61 expression changes in genes encoding GPCRs, such as umami taste receptor subunit TAS1R3 and long  
62 chain fatty acid receptor FFAR4 (21,22). Further studies have demonstrated that there are significant  
63 differences in the mRNA expression of long and short chain fatty acid GPCRs and gustatory receptors  
64 in obese mice compared with lean controls (23), which are altered significantly following gastric  
65 bypass surgery (20). Overall, this suggests plasticity in the expression of nutrient sensing receptors,  
66 enabling dynamic adaptation to environmental factors. It is unknown whether the recently reported  
67 health benefits of increased colonic concentrations of SCFAs, such as propionate (5,7,17), are partly  
68 mediated by an underlying mechanism that alters the ability of the gut to sense other dietary  
69 components/metabolites.

70 In this study, we demonstrate that exposure of EECs to SCFAs can increase the gene expression of a  
71 specific gustatory GPCR, the umami taste receptor, without altering the levels of SCFA receptors. This  
72 altered gene expression was mediated by propionate and butyrate via a  $G\alpha_{i/o}$  signaling pathway,  
73 supporting a SCFA-GPCR signaling mechanism. However, synthetic FFAR2- or FFAR3-selective  
74 ligands could not mimic this. The increased expression of umami taste receptor subunits by SCFAs  
75 resulted in enhanced signaling from this receptor.

76

## 77 **Materials and Methods**

### 78 **Cell culture**

79 STC-1 cells originate from enteroendocrine tumors in the duodenum of double transgenic mice.(24)  
80 This cell line was used for all experiments. STC-1 cells were cultured (95% O<sub>2</sub>; 5% CO<sub>2</sub>; 37°C) in  
81 Dulbecco's modified Eagle's Medium (DMEM) containing 4.5 g/L D-glucose, 4 mM L-Glutamine  
82 (Sigma), supplemented with 10% FBS (Sigma), 100 U/mL penicillin and 100 mg/L streptomycin  
83 (ThermoFisher; DMEM+/+).

### 84 **Ligand treatment**

85 STC-1 cells were grown to 70–80% confluency before treatment with SCFAs. All SCFAs were stored  
86 in solid salt form (Sigma). Solutions (100 mM) were made fresh for every experiment by dissolving in  
87 DMEM+/+ for incubations <5 hrs and in serum-free media for incubations <5 hrs.  
88 2-(4-chlorophenyl)-3-methyl-N-(thiazole-2-yl)butanamide (4-CMTB; Tocris) was used as a  
89 FFAR2-specific agonist and AR420626 (Cayman) was used as an FFAR-specific agonist, both at a  
90 working concentration of 10 μM.

### 91 **Quantitative-PCR**

92 After incubations with SCFAs, TRIzol® Reagent (Life Technologies) was used to extract RNA from  
93 STC-1 cells. After purification, 1 μg of each RNA sample was treated with an RNase inhibitor  
94 (ThermoFisher) and a DNase I treatment kit (Life Technologies). SuperScript IV Reverse  
95 Transcriptase kit (Life Technologies) was used to synthesize complimentary DNA (cDNA). qPCR was  
96 performed using SYBR-Green PCR Mastermix kit (ThermoFisher). Each reaction was run in triplicates  
97 and cDNA was replaced with nuclease-free water as a negative control. Reactions were performed  
98 using the ABI StepONE sequence system. The 2<sup>-ΔΔCT</sup> method(25) was used for analysis of raw C<sub>t</sub>  
99 values. Briefly, gene expression was normalized to the housekeeping gene β-actin, and values from  
100 treated cells were compared to the expression of untreated controls. All primer sequences used were  
101 purchased predesigned from Sigma Aldrich UK (sequences found in **Supplementary Table 1**). Serial  
102 dilution curves were performed to ensure primer efficacy of 90–110%.

### 103 **Measurement of intracellular cAMP**

104 All cAMP assays were performed in serum-free DMEM (Sigma) supplemented with  
105 3-isobutyl-1-methylxanthine (IBMX; Sigma) to inhibit phosphodiesterase cAMP degradation. cAMP  
106 concentrations were measured from cell lysates after cells were incubated for 5 minutes with synthetic  
107 agonists (10 μM) for FFAR2 (4-CMTB) or FFAR3 (AR420626) using the HTRF cAMP Dynamic 2  
108 immunoassay kit (CisBio). Fluorescence was measured with a PHERAstar FSX plate reader (BMG  
109 Labtech) equipped with HTRF 337 optic module, with excitation at 340 nm and measurements of  
110 emission at 620 nm and 665 nm. cAMP levels were interpolated from an cAMP standard curve and  
111 normalized to protein concentration. All experiments were conducted in triplicate and repeated at least  
112 3 times.

### 113 **Measurement of intracellular inosine-1-phosphate (IP<sub>1</sub>)**

114 IP<sub>1</sub> signaling assays were performed after incubation with SCFAs to evaluate the response of STC-1  
115 cells to L-monosodium glutamate (L-MSG; Sigma) and L-Alanine (L-Ala; Sigma), selected due to  
116 their potency at the rodent umami taste receptor (26):(27). All reactions were performed in the presence  
117 and absence of inosine monophosphate (IMP, 2 mM) in serum-free DMEM (Sigma) supplemented

118 with 50 mM LiCl (Sigma). After cells were treated with ligands (30 min), IP<sub>1</sub> concentrations were  
119 measured from cell lysates using the HTRF IP-One immunoassay kit (CisBio). Fluorescence was  
120 measured and IP<sub>1</sub> levels were quantified using the same methodology as the cAMP assay.

## 121 **Ca<sup>2+</sup> mobilization**

122 Intracellular levels of Ca<sup>2+</sup> were measured using the Fluo-4AM Direct Calcium Assay Kit (Invitrogen).  
123 STC-1 cells were incubated with a 1:1 ratio of opti-MEM media (Sigma, UK) to calcium dye  
124 Fluo-4-AM Direct for 30 min at 37°C and for a further 30 min at room temperature. Cells were imaged  
125 using a Leica Confocal Microscope (20X dry objective; 488 nm excitation). Movies were recorded at  
126 1 fps for 60 sec before addition of IMP/control (2 mM). After ensuring no calcium mobilization in  
127 response to IMP, ligands (L-Ala or L-MSG) were added and movies were recorded until the readout  
128 returned to basal levels. All conditions for each experiment were conducted in duplicate and repeated  
129 at least three times. The fluorescence intensity of each cell was quantified using the ImageJ plugin  
130 Time Series Analyzer. The maximal intensity was obtained from subtracting the average background  
131 intensity (recorded before ligand addition) for each cell and averaged across 20 cells per condition.

## 132 **Statistical analysis**

133 Data is represented as the mean ± the standard error (SE). GraphPad Prism was used to determine  
134 significance (p<0.05), using unpaired Student's t tests, One-way ANOVA with a Dunnett post-hoc, or  
135 Two-way ANOVA followed by a Bonferroni post-hoc test.

## 136 **Results**

### 137 **A physiologically relevant concentration of SCFAs significantly increases the expression of** 138 **taste receptor transcripts**

139 A key aim of our study was to determine whether SCFA treatment of EECs would alter GPCRs  
140 previously demonstrated to be differentially expressed between obese and lean mice and humans (20–  
141 23), with a specific focus on the taste receptor GPCRs. Initially we confirmed that STC-1 cells  
142 expressed FFAR2, FFAR3, TAS1R1, TASR2, TAS1R3, the taste receptor-associated G-protein,  
143 α-gustducin, and two bitter taste receptors, TAS2R(108) and TAS2R(138), that were selected based  
144 on their potential involvement in bitter compound-induced calcium signaling (28). We detected  
145 transcripts for all these genes in STC-1 cells, albeit in varying amounts (**Figure 1A**), confirming this  
146 cell-line represented an appropriate model in which to study potential interactions between SCFA  
147 signaling and the gustatory signaling system.

148  
149 To determine whether SCFAs can influence the expression of taste GPCRs, STC-1 cells were incubated  
150 for 2 hrs with SCFAs in a 3:1:1 molar ratio of acetate:propionate:butyrate at 5 or 10mM (final  
151 concentration) chosen to reflect the physiological SCFA concentrations in the proximal and distal  
152 colon(3,4). qPCR was used to analyze the relative changes in expression of the transcripts of TAS1R1,  
153 TAS1R2, TAS2 (108) and TAS2 (138). Incubation with 10 mM SCFAs significantly  
154 upregulated all taste receptors (p<0.001 vs. control), whereas incubation at 5 mM only significantly  
155 upregulated TAS1R1 and TAS1R2 (**Figure 1B**). The largest fold change was observed with transcripts  
156 for TAS1R1 where SCFAs (10 mM) induced a 6.7-fold increase over basal levels (**Figure 1B**). Based  
157 on these initial observations we decided to investigate the mechanism of upregulation of the TAS1R1  
158 subunit further. As TAS1R1 is only functionally active when it is heterodimerized with TAS1R3 (the  
159 umami taste receptor),(26,27) we extended our investigation to include the TAS1R3 subunit. Treatment  
160 of cells with SCFAs (5 mM) over time (1–5 hr) revealed that TAS1R1 was significantly upregulated  
161 following 2, 3 and 5 hr of SCFA incubation (**Figure 1C**). Conversely, SCFAs at 5 mM did not affect

162 the levels of TAS1R3 (**Figure 1D, 1B**). SCFAs did not alter the expression of SCFA receptors FFAR2  
163 and FFAR3 (**Figure 1E, 1F**) at any time-point.  
164

### 165 **The umami taste receptor is significantly upregulated by SCFAs, but not synthetic FFAR** 166 **ligands**

167 After demonstrating that a 3:1:1 mixture of SCFAs can influence the expression profiles of components  
168 of the umami taste receptor, we assessed whether specific SCFAs mediate these changes. STC-1 cells  
169 were treated with either acetate, propionate or butyrate (10 mM) for 5 hr, after which, mRNA levels of  
170 TAS1R1 and TAS1R3 were measured. Interestingly, incubation with propionate or butyrate, but not  
171 acetate, was sufficient to induce significant upregulation of both components of the umami taste  
172 receptor. TAS1R1 was upregulated ~15-fold by both propionate (p=0.0186) and butyrate (p=0.0001;  
173 **Figure 2A**). TAS1R3 was upregulated more modestly than TAS1R1, by ~3-fold following propionate  
174 (p=0.01) or butyrate (p=0.04) treatment (**Figure 2B**).  
175

176 As SCFAs have been reported to be able to activate both FFAR2 and FFAR3 (9), we used synthetic  
177 ligands to determine whether selective activation of each receptor had a similar effect on umami taste  
178 receptor gene expression. STC-1 cells were exposed to 4-CMTB, a FFAR2-specific agonist, or  
179 AR420626, a FFAR3-specific agonist at concentrations known to induce maximal signal responses  
180 (12, 15). The ability of these synthetic ligands to activate the  $G\alpha_{i/o}$  signaling, via inhibition of  
181 forskolin-induced increases in cAMP levels was also confirmed (See **Supplementary Figure 1**). While  
182 these ligands activate  $G\alpha_{i/o}$  signaling, as do SCFAs, they were not able to upregulate the umami taste  
183 receptors (**Figure 2C, 2D**). Indeed, 4-CMTB induced a significant 2-fold decrease in mRNA levels of  
184 TAS1R3 (**Figure 2D**).  
185

### 186 **SCFA-induced upregulation of the umami taste receptor involves $G\alpha_{i/o}$ signaling**

187 At rodent orthologs of FFAR2 and FFAR3, both propionate and butyrate show significant selectivity  
188 for FFAR3(15) a receptor known to signal via  $G\alpha_{i/o}$  (9). To investigate whether  $G\alpha_{i/o}$  activation plays  
189 a fundamental role in the SCFA-induced upregulation of umami taste receptor transcripts, STC-1 cells  
190 were incubated for 18 hrs with pertussis toxin (PTX), a  $G\alpha_{i/o}$  inhibitor. Compared to the basal levels of  
191 the PTX-pretreated control, pretreatment of cells with PTX significantly reduced the ability of  
192 propionate and butyrate to induce upregulation of TAS1R1, from 18.4-fold to 4.6-fold for propionate,  
193 and from 16.5-fold to 6.3-fold for butyrate (**Figure 3A**). PTX-pretreatment completely abolished the  
194 propionate- and butyrate-induced upregulation of TAS1R3 (**Figure 3B**).  
195

### 196 **Umami taste ligands signal in STC-1 cells in a manner that is potentiated by addition of IMP**

197 We then aimed to determine whether the observed upregulation of umami taste receptor mRNA could  
198 be translated into an increase in functional umami receptor signaling. The umami taste receptor is  
199 sensitive to a number of L-amino acids. L-MSG is the characteristic umami-tasting ligand, but studies  
200 have shown this to be less potent at the mouse isoform of the receptor than at the human.(27) It is  
201 documented that L-Ala elicits the strongest  $Ca^{2+}$  signals at the murine umami receptor.(27) Thus, we  
202 selected L-Ala for use in our assays. To confirm the signals were via activation of umami taste receptor,  
203 rather than other amino acid-sensitive receptors, we first assessed whether signaling was synergized  
204 by IMP, as this is a unique signaling property of the umami receptor.(26,27)(29) Taste receptors have  
205 been shown to activate phospholipase C-mediated pathways, leading to formation of 1,4,5-inositol



206 triphosphate (IP<sub>3</sub>) (29), thus, umami taste receptor activation was determined by measurement of  
207 intracellular Ca<sup>2+</sup> and IP<sub>1</sub>, a downstream metabolite of IP<sub>3</sub>. Addition of IMP (2 mM) significantly  
208 increased the levels of Ca<sup>2+</sup> and IP<sub>1</sub> signal induced by both L-MSG and L-Ala (10 mM; **Figure 4A,**  
209 **4B**).

210  
211 **The increase in umami taste receptor transcript on exposure to SCFAs is coupled with an**  
212 **increase in signaling response to some umami taste ligands**  
213

214 To investigate whether upregulation of TAS1R1 and TAS1R3 mRNA by SCFAs translates into an  
215 increase in umami-receptor signaling, we pretreated STC-1 cells overnight with butyrate, at a  
216 concentration able to elicit significant upregulation of both transcripts (**Figure 2A, 2B**). We then  
217 reassessed the cells' signaling response to L-MSG and L-Ala; pre-incubation with butyrate  
218 significantly increased IP<sub>1</sub> signaling and the maximum-induced calcium response to L-Ala/IMP over  
219 time (**Figure 4C–F**). However, L-MSG-induced IP<sub>1</sub> and Ca<sup>2+</sup> responses exhibited greater variability  
220 following butyrate pretreatment (**Figure 4C–F**), potentially consistent with the lower potency of this  
221 ligand compared to L-Ala at the rodent umami taste receptor (27). Overall, this data suggests butyrate-  
222 induced increases in umami taste receptor mRNA also result in enhanced umami taste receptor activity.

223

224 **Discussion**

225 GPCRs expressed in the GI tract have a well-established role in nutrient-sensing and anorectic/incretin  
226 gut hormone secretion (3,5,7,8,16–19). Therefore, developing an understanding of GPCR expression  
227 profiles and signaling functions in EECs has therapeutic value in the field of obesity and Type II  
228 diabetes. SCFAs modulate gene expression in various cells, tissues and species (19,30–34). However,  
229 this is the first report that physiologically relevant concentrations of SCFAs, particularly propionate  
230 and butyrate, can directly and robustly upregulate transcripts encoding GPCRs in EECs. Of particular  
231 note, was the substantial upregulation of the umami taste receptor subunits, as the expression profile  
232 of these is significantly different in the GI tract of obese individuals when compared with lean  
233 controls.(20,21) These observations provide a mechanism to explain how diet composition and SCFA  
234 production are linked with fluctuations in GPCR expression patterns in obese humans and mice (20–  
235 23).

236

237 Our work demonstrated that the most highly upregulated taste receptor transcript upon EEC exposure  
238 to SCFAs was the umami taste receptor subunit TAS1R1. When exposed to a mixture of SCFAs, at a  
239 concentration often found in the colon (4,17), TAS1R1 was upregulated nearly 7-fold, without  
240 affecting expression levels of either of the SCFA receptors FFAR2/FFAR3. The umami taste receptor  
241 is a known heterodimer of TAS1R1 and TAS1R3 (26,27,29). It is co-expressed in GI tissue with CCK  
242 (35) and, on activation by protein hydrolysates, induces cholecystokinin (CCK) secretion from EECs  
243 (36). Interestingly, exposure to either propionate or butyrate robustly enhanced gene expression of  
244 both umami taste receptor subunits. There are two plausible mechanisms for the effects of SCFAs on  
245 the expression of umami receptor transcripts; through FFAR2/3 G-protein signaling or through histone  
246 deacetylase (HDAC) inhibition (37). That both propionate and butyrate, but not acetate, can increase  
247 the levels of these receptor is interesting, and maybe explained by the difference in potency and affinity  
248 of the SCFAs at rodent FFAR2/FFAR3 (15) and at HDACs (37).

249

250 Both FFAR2 and FFAR3 couple to  $G\alpha_{i/o}$  signaling, and our data support a role for this GPCR signaling  
251 pathway in mediating the upregulation of taste receptor genes. We clarified the contribution of  $G\alpha_{i/o}$   
252 signaling elicited by SCFAs (9,12,14,15) by inhibiting FFAR2/3  $G\alpha_{i/o}$  signaling with PTX. PTX  
253 significantly reduced the upregulation of both umami receptor subunits induced by both propionate  
254 and butyrate. This suggests FFAR2/3  $G\alpha_{i/o}$  signaling contributes significantly to the upregulation, even  
255 for butyrate; a very potent HDAC inhibitor (<1 mM) (37). Inhibition of  $G\alpha_{i/o}$  activity abolished  
256 SCFA-induced TAS1R3 upregulation, and significantly reduced propionate-induced TAS1R1  
257 upregulation more than butyrate-induced upregulation. Interestingly, propionate cannot inhibit HDACs  
258 as potently as butyrate, only doing so at high concentrations of >10 mM (37). Together, this potentially  
259 suggests that propionate acts more potently than butyrate through a FFAR2/3 signaling mechanism to  
260 induce TAS1R1 expression. If propionate is acting via FFAR2/3 to modulate gene expression, it may  
261 be hypothesized that FFAR3 is the more likely candidate, as propionate is nearly ten times more  
262 selective for rodent FFAR3 than FFAR2 (15). Furthermore, FFAR3 signaling influences gene  
263 expression in other cellular models: FFAR3 KO murine pancreatic islets have significantly different  
264 transcriptomes to wild-type animals, though in genes associated with insulin secretion and glucose  
265 regulation (38).

266

267 Surprisingly, synthetic FFAR2/FFAR3 selective ligands could not upregulate TAS1R1 or TAS1R3  
268 transcripts, despite their ability to activate upstream receptor signaling in EECs. This suggests that  
269 endogenous SCFA and synthetic ligands have distinct activation profiles at FFAR2/3, thus, potentially  
270 eliciting different downstream responses. If both SCFAs and synthetic ligands activate similar  
271 upstream G-protein pathways, it remains to be determined the additional mechanisms that drive the  
272 SCFA-selective increases in gene transcription of umami taste receptors, but potentially suggests a role  
273 for ligand-induced bias signaling at FFAR2/3.

274

275 We then determined whether SCFAs could enhance functional umami taste receptor activity in STC-1  
276 cells. Other GPCRs able to sense L-AAAs are also expressed in EECs (8,39), but there were some  
277 technical challenges in deciphering the precise contributions of each L-AA-sensitive GPCR, owing to  
278 the lack of selective ligands. However, the synergistic effects of IMP offered a mechanism to detect  
279 umami-specific responses (26,27). Here, umami ligands, L-MSG and L-Ala, only induced increases in  
280  $Ca^{2+}$  and  $IP_1$  in the presence of IMP, as observed when TAS1R1-TAS1R3 is expressed in other  
281 heterologous systems (26,27), supporting a role for TAS1R1-TAS1R3 signaling in STC-1 cells. Our  
282 data demonstrate a significant increase in umami taste receptor signal activity after pretreatment with  
283 butyrate. Of course, we cannot rule out that butyrate may modulate the expression of other genes  
284 involved in  $Ca^{2+}$  signaling, such as  $Ca^{2+}$  channels or other L-AA-sensitive GPCRs (8,39–41). However,  
285 it is still interesting to consider that butyrate exposure enhances L-Ala/IMP-induced  $Ca^{2+}$  signaling:  
286 this is a classical pathway associated with secretion of anorexigenic gut hormones in EECs, which, in  
287 turn, elicit positive physiological effects, including blood glucose regulation and appetite reduction.  
288 Although butyrate alone does not induce gut hormone secretion, under conditions where a mixture of  
289 SCFAs are present, it may augment responses from other metabolites including propionate and thus  
290 will be interesting in future to see if there are alterations in taste receptor activity by propionate  
291 exposure (1,5,7,8,16,19,39).

292 SCFAs induce gut hormone secretion via signaling through their GPCRs.(12,16,18) Using the evidence  
293 gathered here, it is highly plausible that SCFAs also act to “reprogram” EECs to distinct, seemingly  
294 unrelated, dietary nutrients, by upregulating the counterparts receptive to their signaling. The temporal  
295 nature of these changes in terms of kinetics, and the duration in vivo will be important future steps to

296 translate these findings. Despite this, our findings support the idea that GPCR signaling networks in  
297 EECs are highly complex, exhibiting the potential to adapt in response to dynamic fluctuations of  
298 bioactive nutrients (8,18,43,19–23,32,39,42). In summary, we can conclude that SCFA-induced  
299 remodeling of the GPCR signal system is an interesting and novel area that needs to be explored further,  
300 as it has potential therapeutic value.

### 301 **Conflict of Interest**

302 A.J.B is a shareholder in Heptares Therapeutics (part of the Sosei Group) and hold stock options in  
303 the Sosei Group. The remaining authors declare no conflict of interest.

### 304 **Author Contributions**

305 M.S performed all experiments under supervision of E.W.T, G.F and A.C.H. M.S, A.J.B, G-A, E.W.T.,  
306 G.F and A.C.H designed research and analyzed data and wrote the paper. All authors critically read  
307 and approved the final manuscript.

### 308 **Funding**

309 This work was supported by grants from the Biotechnology and Biological Sciences Research  
310 Council to G.F, A.C.H and E.W.T (BB/N016947/1). M.S. was funded by a Medical Research  
311 Council Industrial Case award, Grant Reference MR/R015732/1.

312

### 313 **References**

- 314 1. Egerod KL, Engelstoft MS, Grunddal K V., Nøhr MK, Secher A, Sakata I, Pedersen J,  
315 Windeløv JA, Füchtbauer EM, Olsen J, et al. A major lineage of enteroendocrine cells  
316 coexpress CCK, secretin, GIP, GLP-1, PYY, and neurotensin but not somatostatin.  
317 *Endocrinology* (2012) doi:10.1210/en.2012-1595
- 318 2. Cummings JH, Pomare EW, Branch HWJ, Naylor CPE, MacFarlane GT. Short chain fatty  
319 acids in human large intestine, portal, hepatic and venous blood. *Gut* (1987)  
320 doi:10.1136/gut.28.10.1221
- 321 3. Venegas DP, De La Fuente MK, Landskron G, González MJ, Quera R, Dijkstra G, Harmsen  
322 HJM, Faber KN, Hermoso MA. Short chain fatty acids (SCFAs) mediated gut epithelial and  
323 immune regulation and its relevance for inflammatory bowel diseases. *Front Immunol* (2019)  
324 doi:10.3389/fimmu.2019.00277
- 325 4. Hijova E, Chmelarova A. Short chain fatty acids and colonic health. *Bratisl Lek Listy* (2007)
- 326 5. Chambers ES, Viardot A, Psichas A, Morrison DJ, Murphy KG, Zac-Varghese SEK,  
327 MacDougall K, Preston T, Tedford C, Finlayson GS, et al. Effects of targeted delivery of  
328 propionate to the human colon on appetite regulation, body weight maintenance and adiposity  
329 in overweight adults. *Gut* (2015) doi:10.1136/gutjnl-2014-307913
- 330 6. Kimura I, Ozawa K, Inoue D, Imamura T, Kimura K, Maeda T, Terasawa K, Kashihara D,  
331 Hirano K, Tani T, et al. The gut microbiota suppresses insulin-mediated fat accumulation via



- 332 the short-chain fatty acid receptor GPR43. *Nat Commun* (2013) doi:10.1038/ncomms2852
- 333 7. Chambers ES, Byrne CS, Aspey K, Chen Y, Khan S, Morrison DJ, Frost G. Acute oral sodium  
334 propionate supplementation raises resting energy expenditure and lipid oxidation in fasted  
335 humans. *Diabetes, Obes Metab* (2018) doi:10.1111/dom.13159
- 336 8. Husted AS, Trauelsen M, Rudenko O, Hjorth SA, Schwartz TW. GPCR-Mediated Signaling  
337 of Metabolites. *Cell Metab* (2017) doi:10.1016/j.cmet.2017.03.008
- 338 9. Brown AJ, Goldsworthy SM, Barnes AA, Eilert MM, Tcheang L, Daniels D, Muir AI,  
339 Wigglesworth MJ, Kinghorn I, Fraser NJ, et al. The orphan G protein-coupled receptors  
340 GPR41 and GPR43 are activated by propionate and other short chain carboxylic acids. *J Biol*  
341 *Chem* (2003) doi:10.1074/jbc.M211609200
- 342 10. Tazoe H, Otomo Y, Karaki SI, Kato I, Fukami Y, Terasaki M, Kuwahara A. Expression of  
343 short-chain fatty acid receptor GPR41 in the human colon. *Biomed Res* (2009)  
344 doi:10.2220/biomedres.30.149
- 345 11. Karaki SI, Tazoe H, Hayashi H, Kashiwabara H, Tooyama K, Suzuki Y, Kuwahara A.  
346 Expression of the short-chain fatty acid receptor, GPR43, in the human colon. *J Mol Histol*  
347 (2008) doi:10.1007/s10735-007-9145-y
- 348 12. Milligan G, Shimpukade B, Ulven T, Hudson BD. Complex pharmacology of free fatty acid  
349 receptors. *Chem Rev* (2017) doi:10.1021/acs.chemrev.6b00056
- 350 13. Bolognini D, Tobin AB, Milligan G, Moss CE. The pharmacology and function of receptors  
351 for short-chain fatty acids. *Mol Pharmacol* (2016) doi:10.1124/mol.115.102301
- 352 14. Schmidt J, Smith NJ, Christiansen E, Tikhonova IG, Grundmann M, Hudson BD, Ward RJ,  
353 Drewke C, Milligan G, Kostenis E, et al. Selective orthosteric free fatty acid receptor 2  
354 (FFA2) agonists: Identification of the structural and chemical requirements for selective  
355 activation of FFA2 versus FFA3. *J Biol Chem* (2011) doi:10.1074/jbc.M110.210872
- 356 15. Hudson BD, Tikhonova IG, Pandey SK, Ulven T, Milligan G. Extracellular ionic locks  
357 determine variation in constitutive activity and ligand potency between species orthologs of  
358 the free fatty acid receptors FFA2 and FFA3. *J Biol Chem* (2012)  
359 doi:10.1074/jbc.M112.396259
- 360 16. Tolhurst G, Heffron H, Lam YS, Parker HE, Habib AM, Diakogiannaki E, Cameron J, Grosse  
361 J, Reimann F, Gribble FM. Short-chain fatty acids stimulate glucagon-like peptide-1 secretion  
362 via the G-protein-coupled receptor FFAR2. *Diabetes* (2012) doi:10.2337/db11-1019
- 363 17. Psichas A, Sleeth ML, Murphy KG, Brooks L, Bewick GA, Hanyaloglu AC, Ghatei MA,  
364 Bloom SR, Frost G. The short chain fatty acid propionate stimulates GLP-1 and PYY secretion  
365 via free fatty acid receptor 2 in rodents. *Int J Obes* (2015) doi:10.1038/ijo.2014.153
- 366 18. Psichas A, Reimann F, Gribble FM. Gut chemosensing mechanisms. *J Clin Invest* (2015)  
367 doi:10.1172/JCI76309
- 368 19. Larraufie P, Martin-Gallausiaux C, Lapaque N, Dore J, Gribble FM, Reimann F, Blottiere

- 369 HM. SCFAs strongly stimulate PYY production in human enteroendocrine cells. *Sci Rep*  
370 (2018) doi:10.1038/s41598-017-18259-0
- 371 20. Peiris M, Aktar R, Raynel S, Hao Z, Mumphrey MB, Berthoud HR, Blackshaw LA. Effects of  
372 obesity and gastric bypass surgery on nutrient sensors, endocrine cells, and mucosal  
373 innervation of the mouse colon. *Nutrients* (2018) doi:10.3390/nu10101529
- 374 21. Widmayer P, Küper M, Kramer M, Königsrainer A, Breer H. Altered expression of gustatory-  
375 signaling elements in gastric tissue of morbidly obese patients. *Int J Obes* (2012)  
376 doi:10.1038/ijo.2011.216
- 377 22. Remely M, Aumueller E, Merold C, Dworzak S, Hippe B, Zanner J, Pointner A, Brath H,  
378 Haslberger AG. Effects of short chain fatty acid producing bacteria on epigenetic regulation of  
379 FFAR3 in type 2 diabetes and obesity. *Gene* (2014) doi:10.1016/j.gene.2013.11.081
- 380 23. Widmayer P, Goldschmid H, Henkel H, Küper M, Königsrainer A, Breer H. High fat feeding  
381 affects the number of GPR120 cells and enteroendocrine cells in the mouse stomach. *Front*  
382 *Physiol* (2015) doi:10.3389/fphys.2015.00053
- 383 24. Mc Carthy T, Green BD, Calderwood D, Gillespie A, Cryan JF, Giblin L. “STC-1 cells,” in  
384 *The Impact of Food Bioactives on Health: In Vitro and Ex Vivo Models* doi:10.1007/978-3-  
385 319-16104-4\_19
- 386 25. Livak KJ, Schmittgen TD. Analysis of relative gene expression data using real-time  
387 quantitative PCR and the 2- $\Delta\Delta$ CT method. *Methods* (2001) doi:10.1006/meth.2001.1262
- 388 26. Nelson G, Chandrashekar J, Hoon MA, Feng L, Zhao G, Ryba NJP, Zuker CS. An amino-acid  
389 taste receptor. *Nature* (2002) doi:10.1038/nature726
- 390 27. Toda Y, Nakagita T, Hayakawa T, Okada S, Narukawa M, Imai H, Ishimaru Y, Misaka T.  
391 Two distinct determinants of ligand specificity in T1R1/T1R3 (the umami taste receptor). *J*  
392 *Biol Chem* (2013) doi:10.1074/jbc.M113.494443
- 393 28. Chen MC, Wu SV, Reeve JR, Rozengurt E. Bitter stimuli induce Ca<sup>2+</sup> signaling and CCK  
394 release in enteroendocrine STC-1 cells: Role of L-type voltage-sensitive Ca<sup>2+</sup> channels. *Am J*  
395 *Physiol - Cell Physiol* (2006) doi:10.1152/ajpcell.00003.2006
- 396 29. Kinnamon SC. Umami taste transduction mechanisms. in *American Journal of Clinical*  
397 *Nutrition* doi:10.3945/ajcn.2009.27462K
- 398 30. Paturi G, Butts CA, Stoklosinski H, Ansell J. Effects of early dietary intervention with a  
399 fermentable fibre on colonic microbiota activity and mucin gene expression in newly weaned  
400 rats. *J Funct Foods* (2012) doi:10.1016/j.jff.2012.02.013
- 401 31. Tappenden KA, Drozdowski LA, Thomson ABR, McBurney MI. Short-chain fatty acid-  
402 supplemented total parenteral nutrition alters intestinal structure, glucose transporter 2  
403 (GLUT2) mRNA and protein, and proglucagon mRNA abundance in normal rats. *Am J Clin*  
404 *Nutr* (1998) doi:10.1093/ajcn/68.1.118
- 405 32. Sanderson IR. Short Chain Fatty Acid Regulation of Signaling Genes Expressed by the

- 406 Intestinal Epithelium. *J Nutr* (2004) doi:10.1093/jn/134.9.2450s
- 407 33. Haenen D, Zhang J, Souza da Silva C, Bosch G, van der Meer IM, van Arkel J, van den Borne  
408 JJGC, Pérez Gutiérrez O, Smidt H, Kemp B, et al. A Diet High in Resistant Starch Modulates  
409 Microbiota Composition, SCFA Concentrations, and Gene Expression in Pig Intestine. *J Nutr*  
410 (2013) doi:10.3945/jn.112.169672
- 411 34. Goverse G, Molenaar R, Macia L, Tan J, Erkelens MN, Konijn T, Knippenberg M, Cook ECL,  
412 Hanekamp D, Veldhoen M, et al. Diet-Derived Short Chain Fatty Acids Stimulate Intestinal  
413 Epithelial Cells To Induce Mucosal Tolerogenic Dendritic Cells. *J Immunol* (2017)  
414 doi:10.4049/jimmunol.1600165
- 415 35. Bezençon C, le Coutre J, Damak S. Taste-signaling proteins are coexpressed in solitary  
416 intestinal epithelial cells. *Chem Senses* (2007) doi:10.1093/chemse/bjl034
- 417 36. Daly K, Al-Rammahi M, Moran A, Marcello M, Ninomiya Y, Shirazi-Beechey SP. Sensing of  
418 amino acids by the gut-expressed taste receptor T1R1-T1R3 stimulates CCK secretion. *Am J*  
419 *Physiol - Gastrointest Liver Physiol* (2013) doi:10.1152/ajpgi.00074.2012
- 420 37. Waldecker M, Kautenburger T, Daumann H, Busch C, Schrenk D. Inhibition of histone-  
421 deacetylase activity by short-chain fatty acids and some polyphenol metabolites formed in the  
422 colon. *J Nutr Biochem* (2008) doi:10.1016/j.jnutbio.2007.08.002
- 423 38. Priyadarshini M, Villa SR, Fuller M, Wicksteed B, Mackay CR, Alquier T, Poitout V,  
424 Mancebo H, Mirmira RG, Gilchrist A, et al. An acetate-specific GPCR, FFAR2, regulates  
425 insulin secretion. *Mol Endocrinol* (2015) doi:10.1210/me.2015-1007
- 426 39. Symonds EL, Peiris M, Page AJ, Chia B, Dogra H, Masding A, Galanakis V, Atiba M, Bulmer  
427 D, Young RL, et al. Mechanisms of activation of mouse and human enteroendocrine cells by  
428 nutrients. *Gut* (2015) doi:10.1136/gutjnl-2014-306834
- 429 40. Alamshah A, Spreckley E, Norton M, Kinsey-Jones JS, Amin A, Ramgulam A, Cao Y,  
430 Johnson R, Saleh K, Akalestou E, et al. L-phenylalanine modulates gut hormone release and  
431 glucose tolerance, and suppresses food intake through the calcium-sensing receptor in rodents.  
432 *Int J Obes* (2017) doi:10.1038/ijo.2017.164
- 433 41. Riccardi D, Kemp PJ. The Calcium-Sensing Receptor Beyond Extracellular Calcium  
434 Homeostasis: Conception, Development, Adult Physiology, and Disease. *Annu Rev Physiol*  
435 (2012) doi:10.1146/annurev-physiol-020911-153318
- 436 42. Habib AM, Richards P, Cairns LS, Rogers GJ, Bannon CAM, Parker HE, Morley TCE, Yeo  
437 GSH, Reimann F, Gribble FM. Overlap of endocrine hormone expression in the mouse  
438 intestine revealed by transcriptional profiling and flow cytometry. *Endocrinology* (2012)  
439 doi:10.1210/en.2011-2170
- 440 43. Pavlos NJ, Friedman PA. GPCR Signaling and Trafficking: The Long and Short of It. *Trends*  
441 *Endocrinol Metab* (2017) doi:10.1016/j.tem.2016.10.007
- 442

## 443 Figure Legends

### 444 **Figure 1. Exposure to SCFAs significantly changes the expression profile of taste receptors in** 445 **STC-1 cells**

446 **A)** RNA was extracted from STC-1 cells for qPCR analysis of taste receptors TAS1R1, TAS1R3,  
447 TAS1R2, TAS2(108) and TAS2(138); free fatty acids receptors FFAR2 and FFAR3; and  
448 taste-specific G-protein  $\alpha$ -gustducin, and normalized to the levels of housekeeping gene  $\beta$ -actin.  
449 **B-G)** STC-1 cells were treated with NaCl (control; white bars), 5 mM SCFAs (grey bars) or 10 mM  
450 SCFA (black bars) for 2 hrs, after which RNA was extracted, purified and quantified with qPCR.  
451 Results are expressed as a fold change in expression over the untreated control and represents the  
452 average  $\pm$  SEM, n=3. The line indicates a fold change of 1, where there has been no change in  
453 expression. Two-way ANOVA, with Bonferroni post hoc, \$\$\$p<0.001 SCFA (10 mM) vs. NaCl  
454 control, \*\*p<0.01, \*\*\*p<0.001 SCFA (5 mM) vs. NaCl control.

### 455 **Figure 2. SCFAs and synthetic ligands differ in their ability to upregulate the umami taste** 456 **receptor.**

457 SCFAs and FFAR2/3 agonists influence gene expression of TAS1R1 and TAS1R3 differentially in  
458 STC-1 cells

459 **A-B)** STC-1 cells were incubated with NaCl or SCFAs (10 mM) for 5 hrs, after which, RNA was  
460 extracted and purified. Expression of taste receptors TAS1R1 (A), TAS1R3 (B) was quantified using  
461 qPCR analysis and normalized to the levels of housekeeping gene  $\beta$ -actin. Data are expressed as  
462 mean  $\pm$  SEM fold-change in expression over the untreated control (n=3). T-tests vs. control; ns, non-  
463 significant; \*p<0.05; \*\*p<0.01; \*\*\*p<0.001.

464 **C-D)** STC-1 cells were incubated with either 4-CMTB or AZ420626 (10  $\mu$ M) for 5 hrs, after which,  
465 RNA was extracted and purified. Expression of taste receptors TAS1R1 (C), TAS1R3 (D) was  
466 quantified using qPCR analysis and normalized to the levels of housekeeping gene  $\beta$ -actin. Data are  
467 expressed as mean  $\pm$  SEM fold change in expression over the untreated control (n=3). t-tests vs.  
468 control; ns, non-significant; \*p<0.05; \*\*p<0.01; \*\*\*p<0.001.

### 469 **Figure 3 Inhibition of $G\alpha_{i/o}$ signaling impacts SCFA-mediated changes in taste receptor gene** 470 **expression**

471 **A-B)** STC-1 cells were pretreated with  $G\alpha_{i/o}$  inhibitor pertussis toxin (PTX) (200 ng/ $\mu$ L, 18 hrs;  
472 black bars) or no pretreatment (white bars), followed by stimulation with either NaCl, propionate or  
473 butyrate (all 5 mM) for 5 hrs. RNA was extracted and purified. Expression of taste receptors  
474 TAS1R1 (A), TAS1R3 (B) was quantified using qPCR analysis and normalized to the levels of  
475 housekeeping gene  $\beta$ -actin. Data are expressed as mean  $\pm$  SEM fold change in expression over the  
476 NaCl control either with or without PTX exposure (n=3). Two-way ANOVA, Bonferroni post hoc of  
477 no pretreatment vs. PTX treatment for each ligand; ns, non-significant; \*p<0.05; \*\*p<0.01;  
478 \*\*\*p<0.001.

479

### 480 **Figure 4 Umami receptor signaling cascades are potentiated by butyrate pretreatment**

481 **A)** Intracellular calcium levels measured in STC-1 cells, incubated with fluorescence calcium  
482 indicator dye Fluo4-AM following addition of IMP (2 mM, black bars) or NaCl control (white bars;  
483 2 mM) with L-Ala (20 mM) or L-MSG (20 mM). Data is expressed as mean  $\pm$  SEM maximal  
484 fluorescence intensities over the control and is taken from 20 cells per sample, in duplicate (n=3). t-  
485 test vs. control; \*p<0.05; \*\*p<0.01; \*\*\*p<0.001.

486 **B)** Intracellular IP<sub>1</sub> accumulation measured in STC-1 cells on the addition of IMP (black bars) with  
487 either NaCl control (white bars; 2 mM), L-Ala (20 mM) or L-MSG (20 mM). Data is expressed as

488 mean  $\pm$  SEM across three distinct experiments; t-test \* $p < 0.05$ ; \*\* $p < 0.01$ ; \*\*\* $p < 0.001$  vs. control.  
489 **C)** Intracellular calcium levels measured in butyrate-naive (white) or butyrate-pretreated (grey)  
490 STC-1 cells, incubated with fluorescence calcium indicator dye Fluo4-AM, followed by stimulation  
491 with IMP (2 mM) with L-Ala (20 mM) or L-MSG (20 mM). Data is expressed as mean  $\pm$  SEM  
492 maximal fluorescence intensities over the control and are taken from 20 cells per sample, in duplicate  
493 (n=3). t-test vs. control, \* $p < 0.05$ ; \*\* $p < 0.01$ ; \*\*\* $p < 0.001$ .  
494 **D)** Intracellular IP<sub>1</sub> accumulation measured in butyrate-naive (white) or butyrate-pretreated (grey)  
495 STC-1 cells after incubation with IMP (2 mM) and either L-Ala (20 mM) or L-MSG (20 mM). Data  
496 is expressed as mean  $\pm$  SEM (n=3); t-test vs. control, \* $p < 0.05$ ; \*\* $p < 0.01$ ; \*\*\* $p < 0.001$ .  
497 **E-F)** Representative fluorescence intensity plots following IMP (2 mM) and L-Ala (E; 20 mM) or  
498 L-MSG (F; 20 mM) stimulation in butyrate pretreated (red lines) and butyrate naive (black lines)  
499 STC-1 cells, expressed in arbitrary units (AU).



**Figure 1**

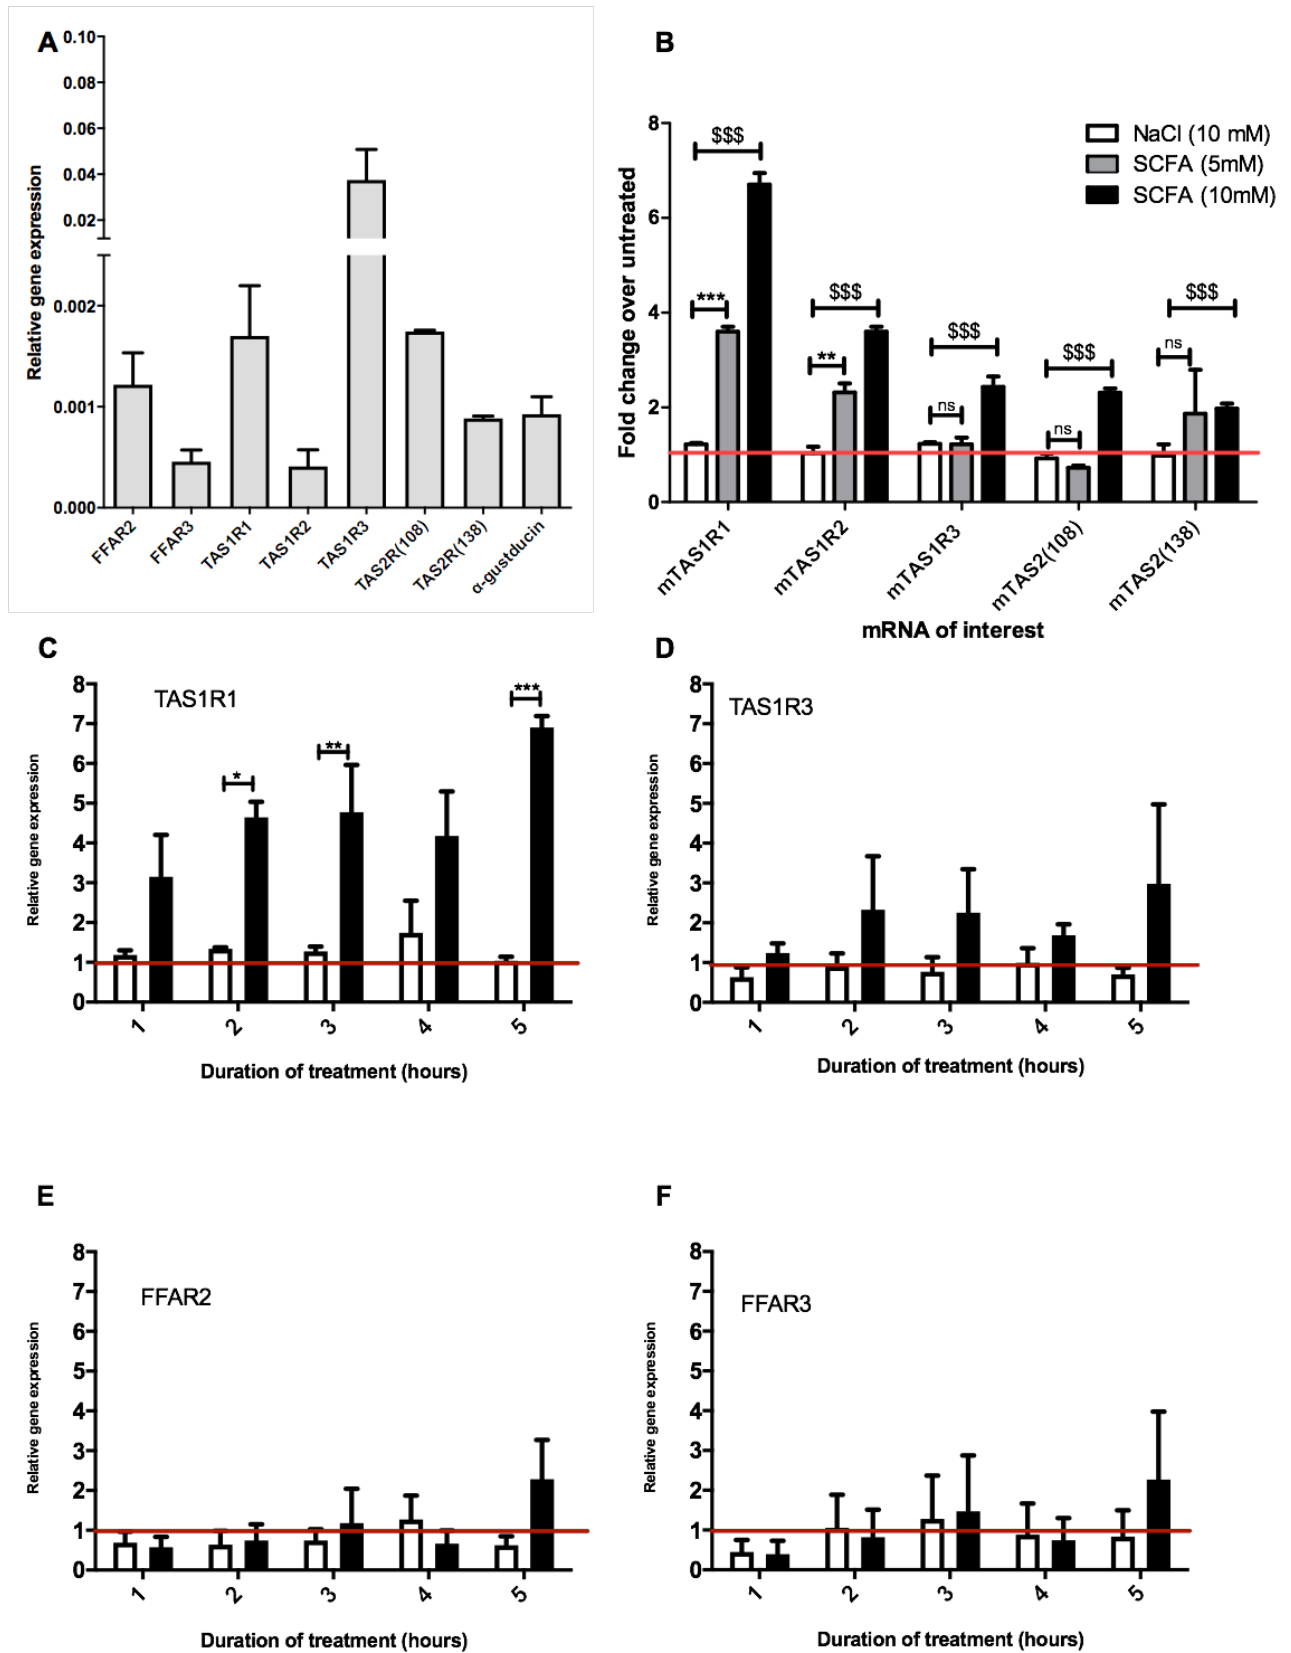

**Figure 2**

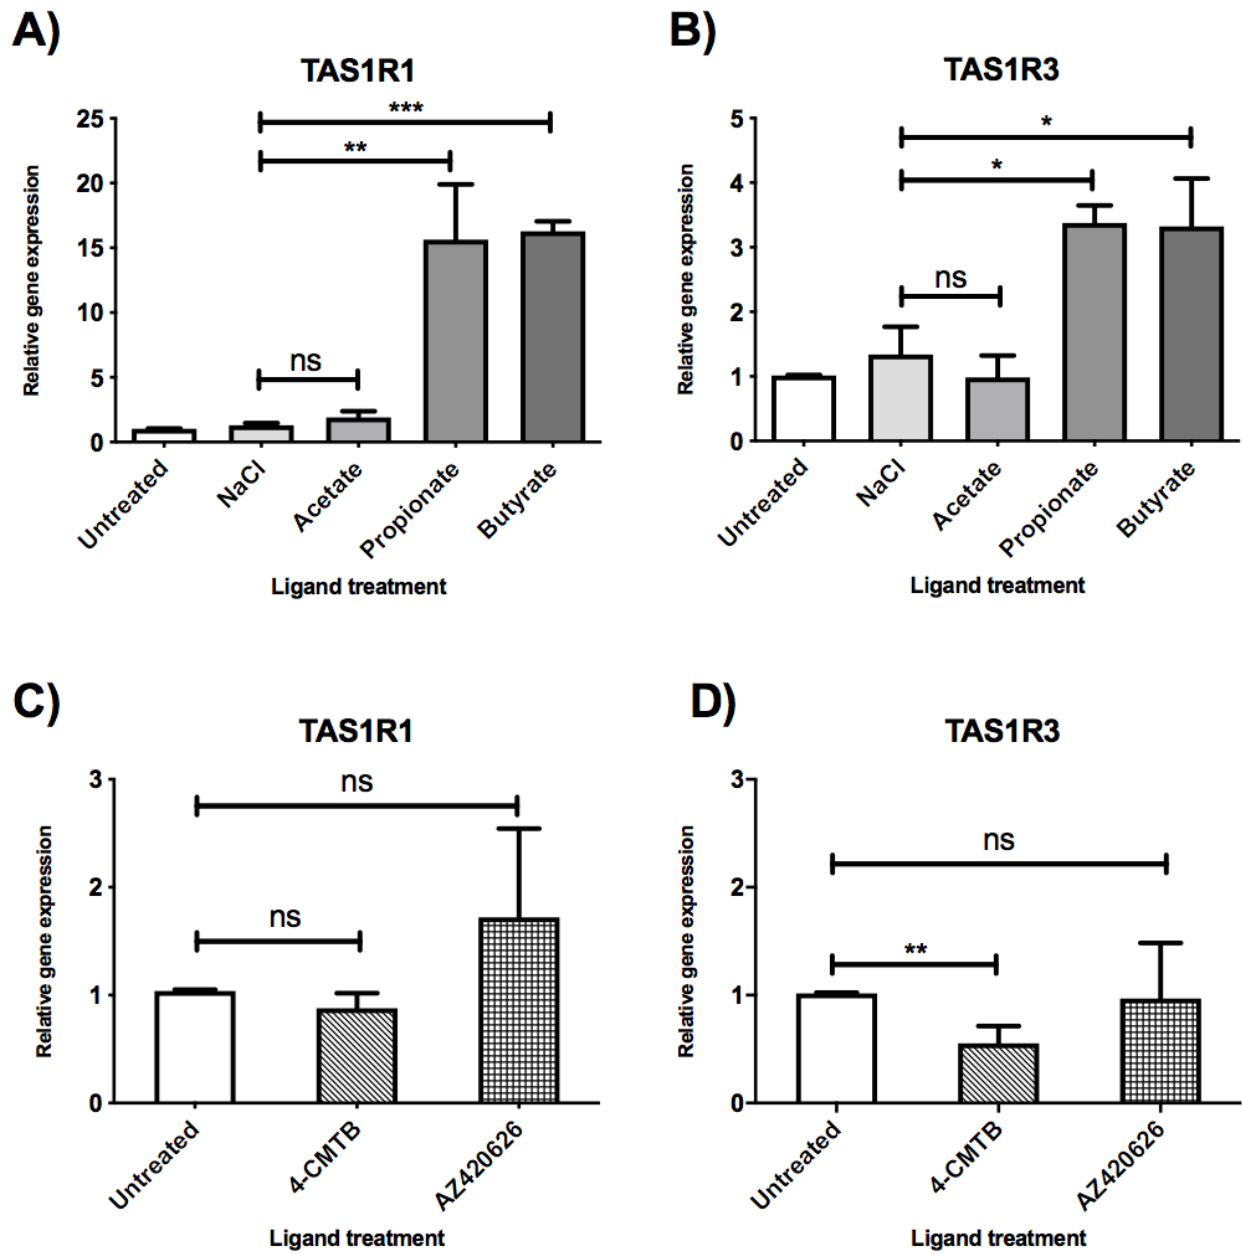

**Figure 3**

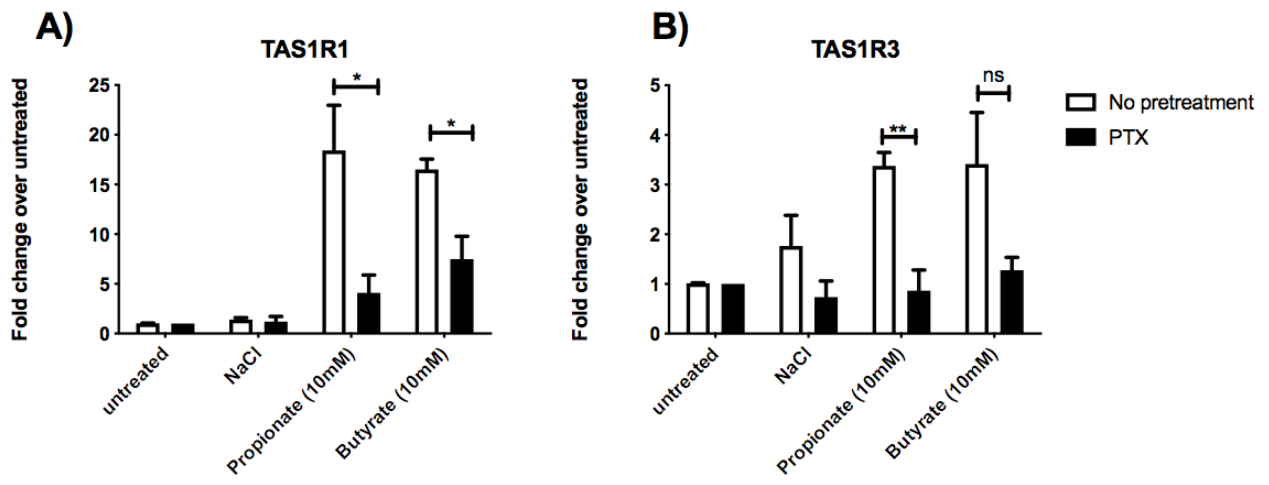

**Figure 4**

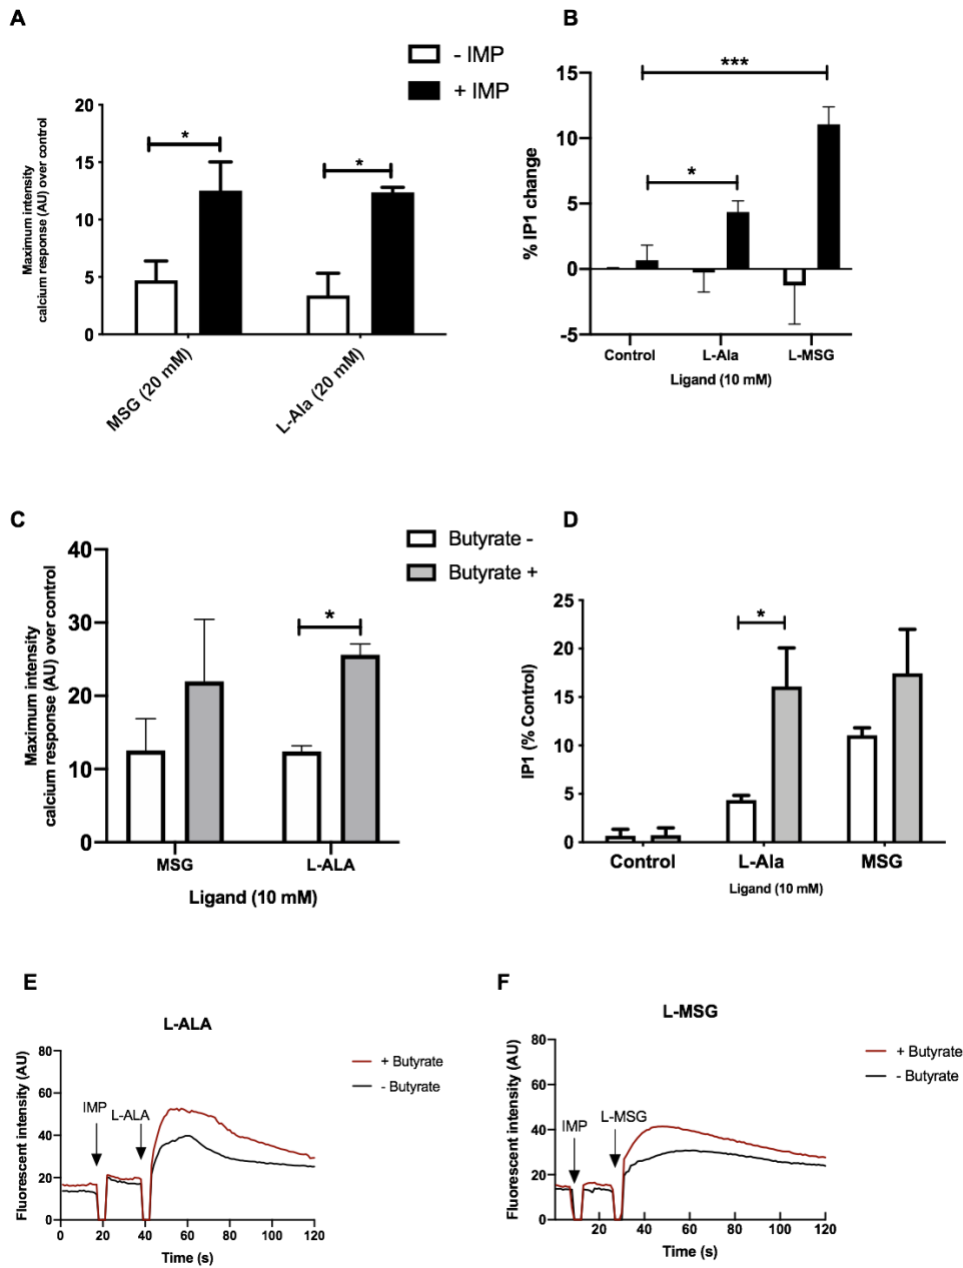

Source: http://biorxiv.org/content/10.1101/2020.06.01.127316v1.full.pdf
